# Supplementary material for: Institutional Logics and Interorganizational Learning in Technological Arenas: Evidence from Standard-Setting Organizations in the Mobile Handset Industry
Source: Atypon-hosted journal article supplement (doi:10.1287/orsc.2014.0940), 2014-11-18
Supplement: orsc.2014.0940-sm-online-appendix.pdf [file orsc.2014.0940-sm-online-appendix.pdf]

## Online Appendix

### Institutional Logics and Inter-Organizational Learning in Technological Arenas:

#### Evidence from Standard Setting Organizations in the Mobile Handset Industry

OS-MS-13-7063.R2

**Figure 1. Model Relationships**

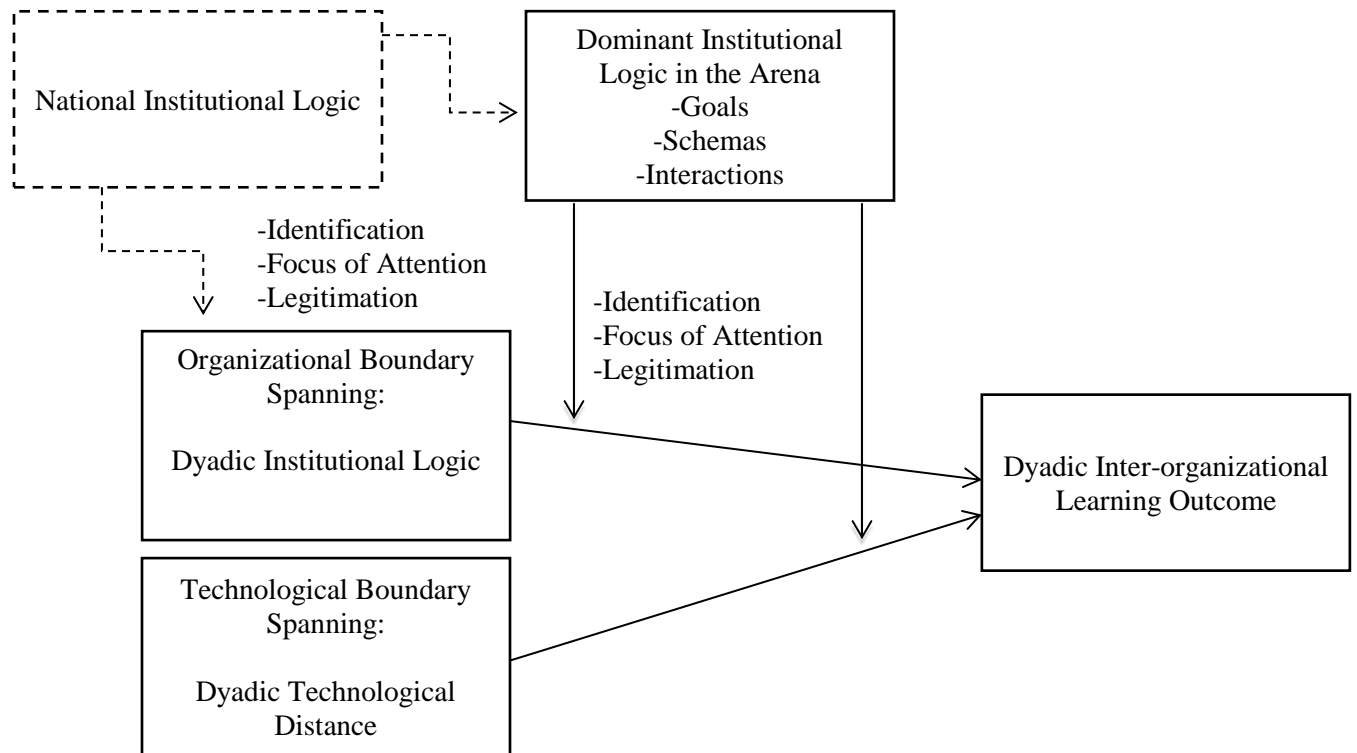

**Table 1. Standards Setting Organizations Summary**

| Standard Setting Organization  | SSO Corporatism                |                      | SSO Formal Establishment |                          |                       |
|--------------------------------|--------------------------------|----------------------|--------------------------|--------------------------|-----------------------|
|                                | Corporatism Index <sup>†</sup> | Polity of Sponsor(s) | State Sponsored          | Basis of Decision Making | Organizing Framework  |
| Nordic Group (2G Proposal)     | 0.94                           | Corporatist          | No                       | Consensus                | Hybrid Committee      |
| W-CDMA (Japan 3G Proposal)     | 0.81                           | Corporatist          | No                       | Sponsor                  | Vertically Integrated |
| NTT (Japan 1G)                 | 0.73                           | Corporatist          | Yes                      | Sponsor                  | Vertically Integrated |
| NMT 450-25 (Nordic 1G)         | 0.65                           | Corporatist          | No                       | Consensus                | Hybrid Committee      |
| D-AMPS (US 2G)                 | 0.65                           | Pluralist            | No                       | 51% Majority Vote        | Market Committee      |
| S900-D (Fr/Ger 2G Proposal)    | 0.61                           | Mixed                | Yes                      | Sponsor                  | Vertically Integrated |
| NMT 900 (Nordic 1G)            | 0.57                           | Corporatist          | No                       | Consensus                | Hybrid Committee      |
| IS-136 (US 2G)                 | 0.56                           | Pluralist            | No                       | 51% Majority Vote        | Market Committee      |
| CDMA-One (Korea 2G)            | 0.55                           | Corporatist          | Yes                      | Sponsor                  | Vertically Integrated |
| GSM (EU 2G)                    | 0.55                           | Mixed                | No                       | 71% Majority Vote        | Hybrid Committee      |
| MATS-E (France 1G)             | 0.43                           | Pluralist            | Yes                      | Sponsor                  | Vertically Integrated |
| TD-SCDMA (China 3G)            | 0.33                           | Corporatist          | Yes                      | Sponsor                  | Vertically Integrated |
| PDC (Japan 2G)                 | 0.25                           | Corporatist          | Yes                      | Sponsor                  | Vertically Integrated |
| TACS (UK 1G)                   | 0.24                           | Pluralist            | No                       | Sponsor                  | Hybrid Committee      |
| CD 900 (Fr/Ger/It 2G Proposal) | 0.21                           | Mixed                | Yes                      | Sponsor                  | Vertically Integrated |
| AMPS (US 1G)                   | 0.14                           | Pluralist            | No                       | Sponsor                  | Hybrid Committee      |
| N-AMPS (US 2G proposal)        | 0.01                           | Pluralist            | No                       | 51% Majority Vote        | Market Committee      |

<sup>†</sup>The SSO Corporatism Index is calculated as  $\frac{1}{G} \sum_{i=1}^G w_{it} \cdot H_{it}$ , where  $H_{it}$  is the Hicks-Kenworthy corporatism measure (Hicks and Kenworthy, 1998) in year  $t$  for the home country of firm  $i$ ,  $w_{it}$  is a socio-technical weighting based on firm  $i$ 's cumulative patenting and interfirm alliances in year  $t$ , and  $G$  is the number of firms in the SSO. For presentation in this table, the index is averaged over the SSO duration.

SSO procedures and characteristics are taken from the standards literature (e.g. Bekkers 2001, Chiao et al. 2007, Farrell and Saloner 1988, Funk and Methe 2001, Funk 2002, Funk 2009, Garrard 1998, Gessler 2002, Lindmark and Granstrand 1995, Manninen 2002, Srivastava 2003, Tate 2001, West 2000).

**Table 2. Sensitivity Analysis**

|                                          | DV: dyadic patent citation, 5 year window |         |               |         |               |         |               |         |               |          |
|------------------------------------------|-------------------------------------------|---------|---------------|---------|---------------|---------|---------------|---------|---------------|----------|
|                                          | Log-odds                                  |         | Mixed Effects |         | Fixed Effects |         | Fixed Effects |         | 3 year window |          |
|                                          | Model 6                                   | Model 6 | Model 7       | Model 7 | Model 8       | Model 8 | Model 9       | Model 9 | Model 10      | Model 10 |
| SSO corporatism                          | -10.45*                                   | (5.52)  | -0.09*        | (0.05)  |               |         | -0.15*        | (0.08)  | -0.41**       | (0.06)   |
| Dyadic corporatism                       | -3.93                                     | (5.16)  | -0.06*        | (0.03)  |               |         | -0.20*        | (0.09)  | -0.17*        | (0.08)   |
| Technological distance                   | -7.44**                                   | (2.27)  | -0.11**       | (0.02)  | -0.09**       | (0.03)  | -0.05         | (0.04)  | -0.11*        | (0.05)   |
| SSO corporatism * Dyadic corporatism     | 15.31*                                    | (7.85)  | 0.08+         | (0.06)  |               |         | 0.42**        | (0.09)  | 0.58**        | (0.11)   |
| SSO corporatism * Tech. distance         | 12.59**                                   | (4.31)  | 0.20**        | (0.04)  |               |         |               |         | 0.22*         | (0.10)   |
| Dyadic corporatism * Tech. distance      |                                           |         |               |         |               |         | 0.09+         | (0.06)  |               |          |
| SSO prop. corporatist                    |                                           |         |               |         | -0.20*        | (0.11)  |               |         |               |          |
| SSO prop. corporatist * Corporatist dyad |                                           |         |               |         | 0.29**        | (0.11)  |               |         |               |          |
| SSO prop. corporatist * Mixed dyad       |                                           |         |               |         | 0.16+         | (0.11)  |               |         |               |          |
| SSO prop. corporatist * Tech. distance   |                                           |         |               |         | 0.14**        | (0.06)  |               |         |               |          |
| <b>SSO controls</b>                      |                                           |         |               |         |               |         |               |         |               |          |
| SSO formal establishment                 | 1.83                                      | (1.41)  | 0.05*         | (0.02)  | 0.05**        | (0.02)  | 0.04+         | (0.02)  | 0.10**        | (0.03)   |
| Statism index                            | 2.38                                      | (7.02)  | -0.26**       | (0.08)  | -0.19         | (0.17)  | -0.28+        | (0.14)  | -0.23*        | (0.11)   |
| Rejected                                 | 0.53                                      | (1.69)  | -0.08**       | (0.03)  | -0.07*        | (0.03)  | -0.04         | (0.03)  | -0.13**       | (0.04)   |
| Age                                      | 0.25                                      | (0.16)  | 0.01**        | (0.00)  | 0.02**        | (0.00)  | 0.02**        | (0.00)  | 0.01**        | (0.00)   |
| Alliance density                         | 0.14                                      | (0.98)  | 0.02          | (0.01)  | 0.02          | (0.02)  | 0.03          | (0.02)  | 0.07          | (0.05)   |
| Cultural diversity                       | -0.25                                     | (0.17)  | 0.00          | (0.00)  | 0.00          | (0.00)  | 0.00          | (0.00)  | -0.01*        | (0.00)   |
| Regional diversity                       | 4.56                                      | (4.77)  | -0.04         | (0.05)  | -0.12         | (0.08)  | -0.08         | (0.08)  | 0.11+         | (0.06)   |
| <b>Dyadic controls</b>                   |                                           |         |               |         |               |         |               |         |               |          |
| Industry experience                      | -0.26                                     | (0.20)  | 0.00+         | (0.00)  | -0.02**       | (0.01)  | -0.02**       | (0.00)  | -0.02**       | (0.01)   |
| Prior alliances                          | 0.49+                                     | (0.29)  | 0.00          | (0.00)  | 0.01+         | (0.00)  | 0.01**        | (0.00)  | 0.01*         | (0.01)   |
| Prior citations (within dyad)            | -0.38**                                   | (0.12)  | -0.00         | (0.00)  | -0.01*        | (0.00)  | -0.01*        | (0.00)  | -0.00**       | (0.00)   |
| Prior patenting                          | 0.04**                                    | (0.01)  | 0.00**        | (0.00)  | 0.00**        | (0.00)  | 0.00**        | (0.00)  | 0.00**        | (0.00)   |
| Prior SSO joint participation            | 2.70**                                    | (0.67)  | 0.00          | (0.00)  | 0.06**        | (0.01)  | 0.07**        | (0.01)  | 0.07**        | (0.02)   |
| Investment                               | -0.22                                     | (0.90)  | -0.01         | (0.01)  | -0.02         | (0.01)  | -0.02         | (0.01)  | -0.01         | (0.01)   |
| Firms in dyad countries                  | 0.09                                      | (0.17)  | 0.00**        | (0.00)  | 0.01          | (0.00)  | 0.00          | (0.00)  | 0.01*         | (0.01)   |
| GDP per capita                           | 0.07                                      | (0.09)  | 0.00          | (0.00)  | -0.00         | (0.00)  | -0.00         | (0.00)  | 0.00          | (0.00)   |
| Lambda                                   | -0.50                                     | (0.35)  | 0.00          | (0.00)  | 0.00          | (0.00)  | 0.00          | (0.00)  | 0.00          | (0.01)   |
| Year dummies                             | Included                                  |         | Included      |         | Included      |         | Included      |         | Included      |          |
| Constant                                 | -7.27                                     | (5.09)  | 0.12+         | (0.07)  | 0.15          | (0.13)  | 0.26**        | (0.09)  | 0.39**        | (0.12)   |
| R-squared                                | 0.45                                      |         |               |         | 0.45          |         | 0.47          |         | 0.37          |          |
| Log likelihood                           | -1026                                     |         | 1351          |         | 1458          |         | 1468          |         | 1126          |          |

Robust standard errors in parentheses

\*\* p<0.01, \* p<0.05, + p<0.10; one-tailed tests for hypothesized parameters; two-tailed tests for controls

## References

- Bekkers R (2001) *Mobile Telecommunications Standards: GSM, UMTS, TETRA, and ERMES* (Artech House, Boston).
- Chiao B, Lerner J, Tirole J (2007) The rules of standard-setting organizations: An empirical analysis. *RAND J. Econom.* **38**(4): 905-930.
- Farrell J, Saloner G (1988) Coordination through committees and markets. *RAND J. Econom.* **19**(2): 235-252.
- Funk JL (2002) *Global Competition Between and Within Standards: The Case of Mobile Phones* (Palgrave, New York).
- Garrard GA (1998) *Cellular Communications: Worldwide Market Development* (Artech House, Boston).
- Gessler F (2002) *The Development of Wireless Infrastructure Standards*. Unpublished doctoral dissertation, Royal Institute of Technology, Stockholm.
- Lindmark S, Granstrand O (1995) Technology and systems competition in mobile communications. Lambertson DM, ed. *Beyond Competition: The Future of Telecommunications* (Elsevier Science, Amsterdam), 323-341.
- Manninen AT (2002) *Elaboration of NMT and GSM standards: From Idea to Market*. Unpublished dissertation, University of Jyväskylä, Finland.
- Srivastava L (2003) *3G Mobile Policy: The Case of Japan*. Office of the Secretary of the International Telecommunications. Accessed on November 28, 2005. [www.itu.int/3g](http://www.itu.int/3g)
- West J (2000) Institutional constraints in the initial deployment of cellular telephone service on three continents. Jacobs K, ed. *Information Technology Standards and Standardization: A Global Perspective* (Idea Group Publishing, Hershey, PA), 198-221.
